# Supplementary material
Source: PubMed Central journal article supplement (PMC5875322)
Supplement: jamapediatr-172-368-s001.pdf [file jamapediatr-172-368-s001.pdf]

## Supplementary Online Content

Tun HM, Bridgman SL, Chari R, et al; Canadian Healthy Infant Longitudinal Development (CHILD) Study Investigators. Roles of birth mode and infant gut microbiota in intergenerational transmission of overweight and obesity from mother to offspring. *JAMA Pediatr*. Published online February 19, 2018. doi:10.1001/jamapediatrics.2017.5535

### **eAppendix.** Detailed Methods

**eFigure 1.** Odds Ratios for (A) Caesarean Delivery and (B) Various Birth Modes, in Relation With Infants Born to OWOB Mothers

**eFigure 2.** Linear Discriminant Analysis (LDA) Scores for Differentially Abundant of Bacterial Taxa Due to Maternal Weight Status ( $P < .05$ )

**eFigure 3.** A Sequential Mediation Model of Associations Between Maternal Weight Status, Modes of Delivery, Infant Gut Microbiota (Total Species Richness), and Childhood OWOB

**eFigure 4.** Microbiota Interaction Networks for Groups of OWOB Phenotype Relationship Between Mothers and Offspring at Age 3 Years

**eTable 1.** Odds Ratios for Childhood OWOB at Age 1 and 3 in Relation to Maternal Weight Status, Birth Modes, and Infant Gut Microbiota

**eTable 2.** Significant Microbiota Measurements in Infant Gut at 3-4 Months, According to Maternal Weight Status ( $P < .05$ )

**eTable 3.** Significant Microbiota Measurements in Infant Gut at 3-4 Months, According to Joint Effects of Maternal Prepregnancy OWOB and Emergency CS ( $P < .05$ )

**eTable 4.** Crude and Adjusted Likelihoods of Infant Gut Microbiota Measurements at 3-4 Months in Relation to Maternal OWOB

**eTable 5.** Crude and Adjusted Likelihoods of Infant Gut Microbiota Measurements at 3-4 Months in Relation to Maternal Prepregnancy OWOB and Emergency Cesarean Delivery

This supplementary material has been provided by the authors to give readers additional information about their work.

## eAppendix. Detailed Methods

### *Fecal microbiota analysis*

Samples were refrigerated immediately after collection and during transport and stored at  $-80^{\circ}\text{C}$  until analysis. Genomic DNA was extracted from 80 to 200 mg of stool using the QIAamp DNA Stool Mini kit (Qiagen, Venlo, the Netherlands). The V4 hypervariable region of the bacterial 16S rRNA gene was amplified by PCR using universal bacterial primers: V4-515f: 5' AAT GAT ACG GCG ACC ACC GAG ATC TAC ACT ATG GTA ATT GTG TGC CAG CMG CCG CGG TAA-3' , V4-806r:5' -CAA GCA GAA GAC GGC ATA CGA GAT XXXXXXXXXXXXX AGT CAG TCA GCC GGA CTA CHV GGG TWT CTA AT-3. For sample multiplexing, reverse primers were barcoded uniquely for each sample (barcoded sequence was denoted in the primer sequence by Xs). Each 25  $\mu\text{l}$  PCR mixture contained 12.5  $\mu\text{l}$  2x Kapa2G Hotstart mix (Kapa Biosystems, Wilmington, MA), 0.6  $\mu\text{M}$  of both forward and reverse primers and 2  $\mu\text{l}$  genomic DNA (5 ng/ $\mu\text{l}$ ). PCR amplification consisted of an initial denaturation step for 3 min at  $94^{\circ}\text{C}$ , followed by 20 cycles of denaturation for 30 s at  $94^{\circ}\text{C}$ , annealing for 30 s at  $50^{\circ}\text{C}$  and an extension step for 30 s at  $72^{\circ}\text{C}$ . PCR reactions for each sample were performed in triplicate with a negative control in each run. One hundred nanograms of pooled PCR product from each sample was concentrated using an Amicon Ultra-4 30K centrifugal filter (Millipore, Billerica, MA, USA), run on a 1.4% agarose gel, extracted and cleaned with the GENE-CLEAN Turbo Kit (MP Biomedicals Inc, Solon, OH, USA). Pooled PCR amplicons were subjected to paired-end sequencing by Illumina Miseq platform.

### *Bioinformatic analysis*

Using a QIIME pipeline (v1.9.0, qiime.org)<sup>1</sup>, forward and reverse reads were assembled using PandaSeq for a final length of 144 bp (unassemblable sequences discarded), demultiplexed and filtered against the GREENGENES reference database (v13.8)<sup>2</sup> to remove all sequences with <60% similarity. Remaining sequences were clustered with Usearch61 at 97% sequence similarity against the GREENGENES database (closed picking algorithm), and taxonomic assignment was achieved using the RDP classifier<sup>3</sup> constrained by GREENGENES. After taxonomic assignment, operational taxonomic units (OTUs) representing bacterial origin were selected, and bacterial OTUs with overall relative abundance below 0.0001 were excluded from subsequent downstream analyses. To avoid the bias due to variation in sequencing depths among samples, data were rarefied to 13,000 sequences per sample.

With the recommended pipeline in QIIME, relative abundance of bacterial OTUs was summarized at the phylum, family and genus levels. Microbial alpha diversity within samples was calculated with three standard indices (Chao1, Shannon and Simpson). Microbial community differences between samples (beta diversity) were examined by the permutational multivariate analysis of variance (PERMANOVA) comparison of both unweighted and weighted UNIFRAC distance matrices, with 1000 permutations.

**eFigure 1.** Odds Ratios for (A) Caesarean Delivery and (B) Various Birth Modes, in Relation With Infants Born to OWOB Mothers

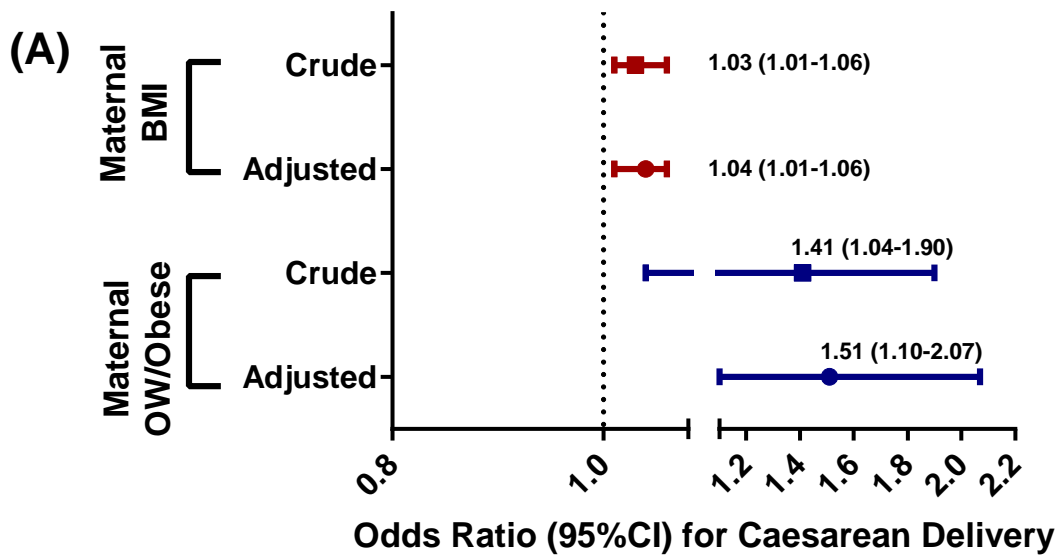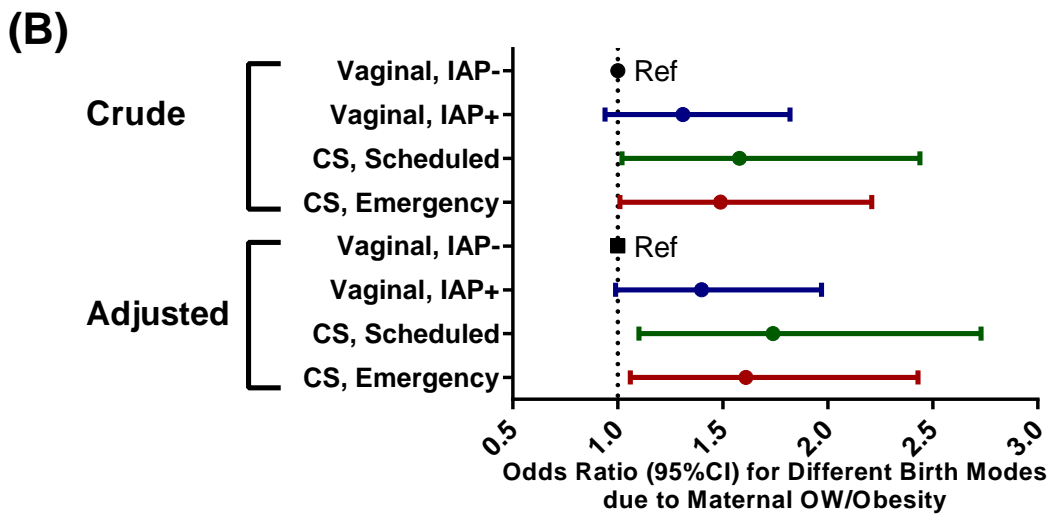

**eFigure 2.** Linear Discriminant Analysis (LDA) Scores for Differentially Abundant of Bacterial Taxa Due to Maternal Weight Status ( $P < .05$ )

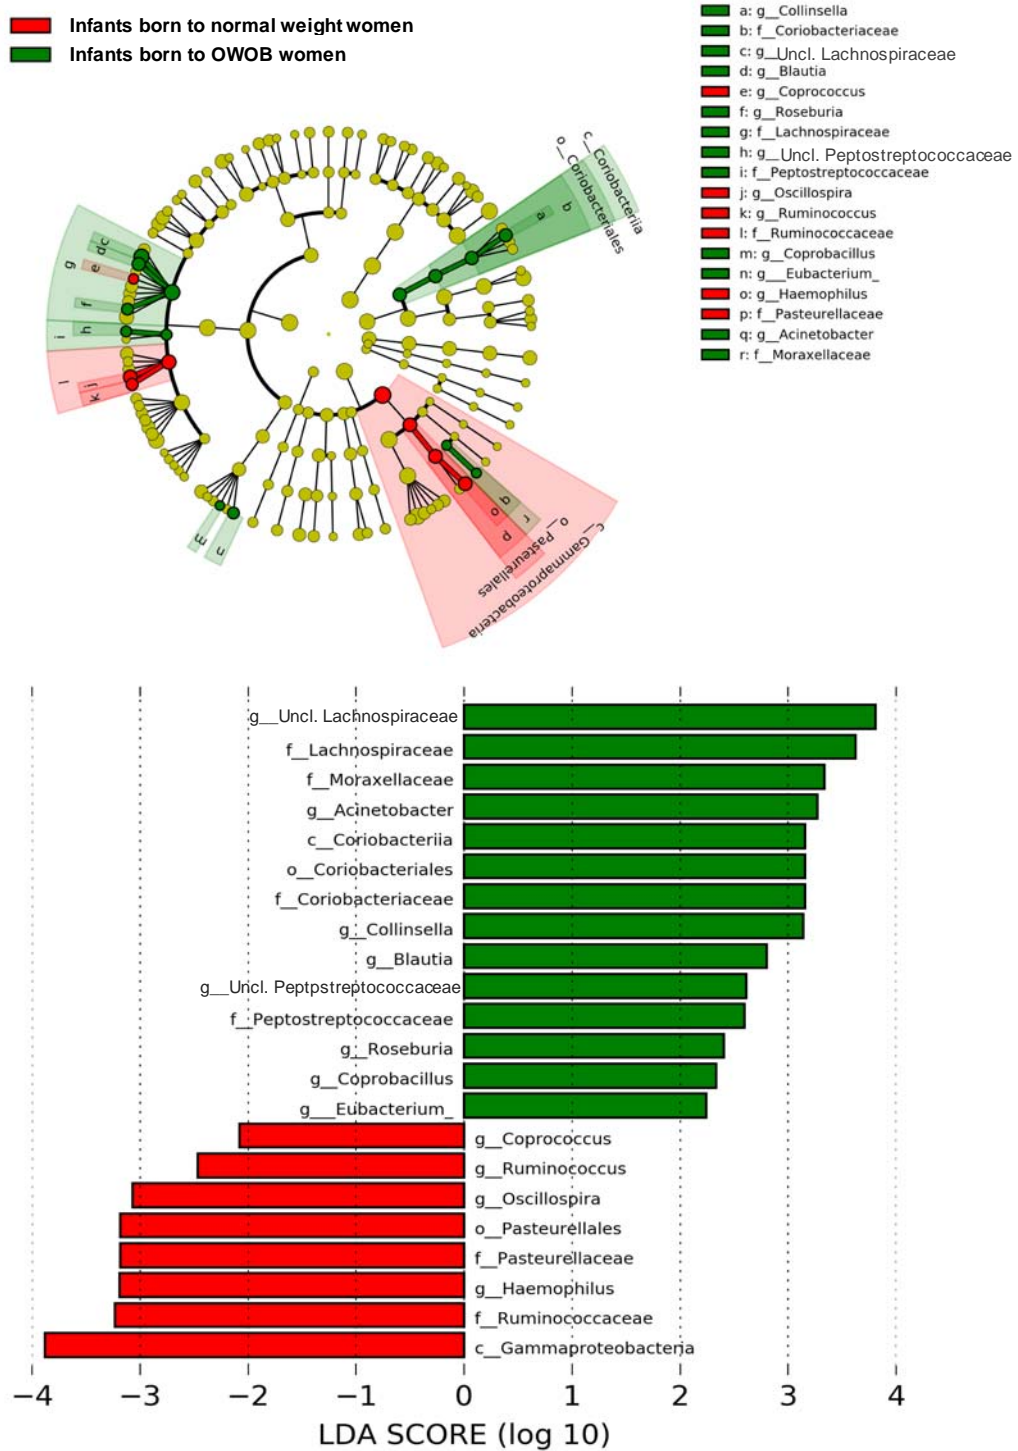

**eFigure 3.** A Sequential Mediation Model of Associations Between Maternal Weight Status, Modes of Delivery, Infant Gut Microbiota (Total Species Richness), and Childhood OWOB

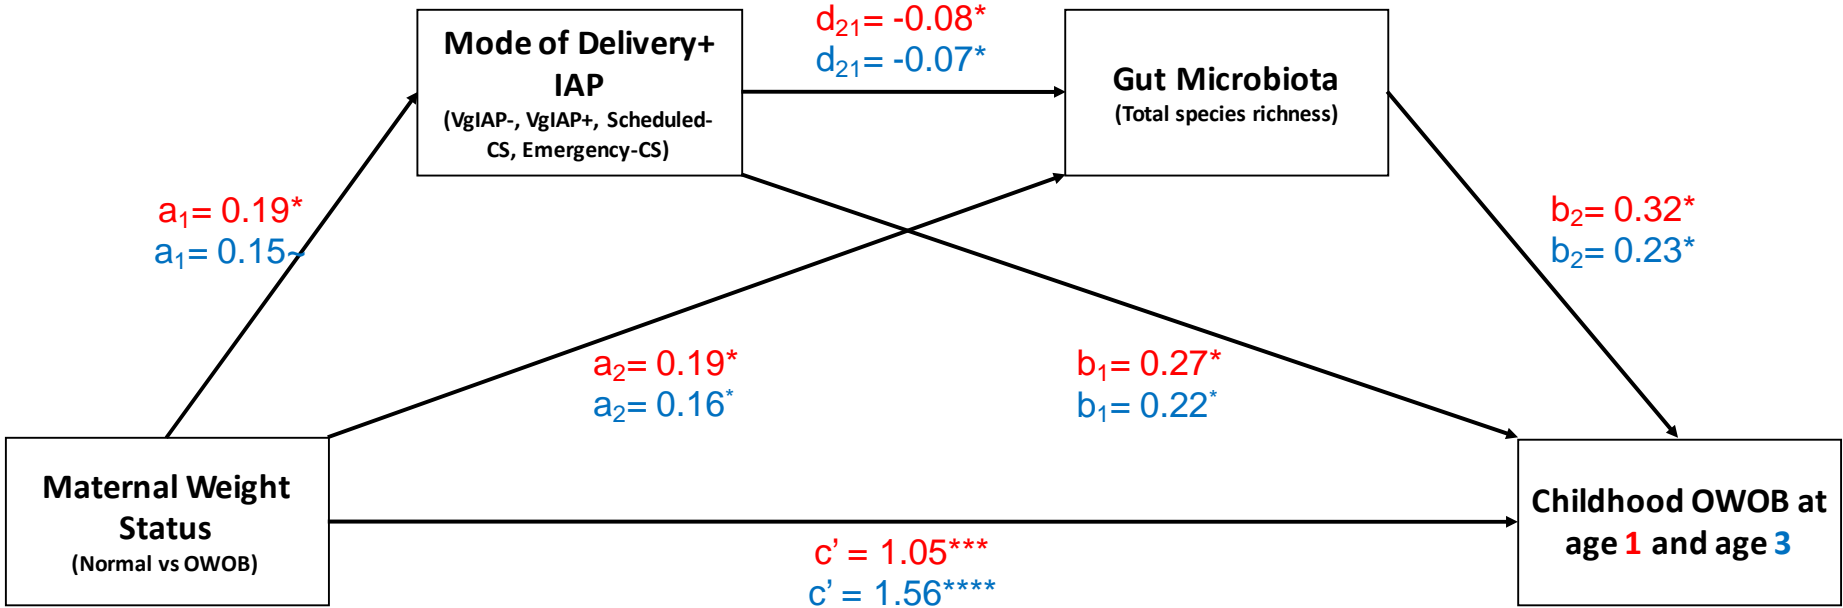

Bootstrap 95%CI for indirect effect ( $a_1 d_{21} b_{20}$ )  
 [-0.017, -0.0006]  
 [-0.012, -0.0001]

- $P < 0.1$ , \* $P < 0.05$ , \*\* $P < 0.01$ , \*\*\* $P < 0.001$ , \*\*\*\*  $P < 0.0001$

**eFigure 4. Microbiota Interaction Networks for Groups of OWOB Phenotype Relationship Between Mothers and Offspring at Age 3 Years**

**Normal Weight Infants of Normal Weight Mothers**

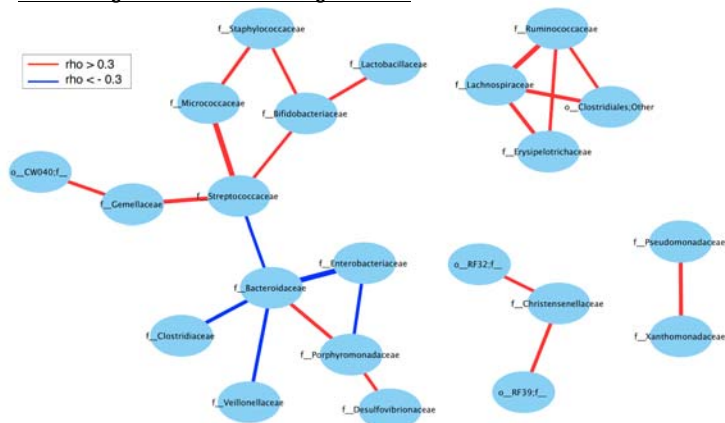

**OWOB Infants of Normal Weight Mothers**

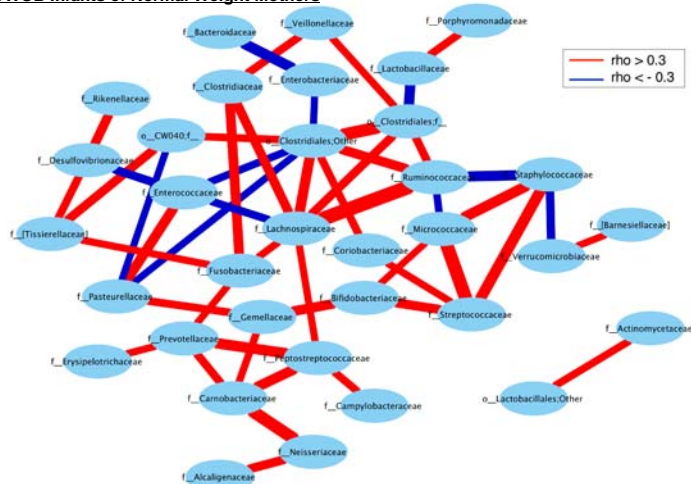

**Normal Weight Infants of OWOB Mothers**

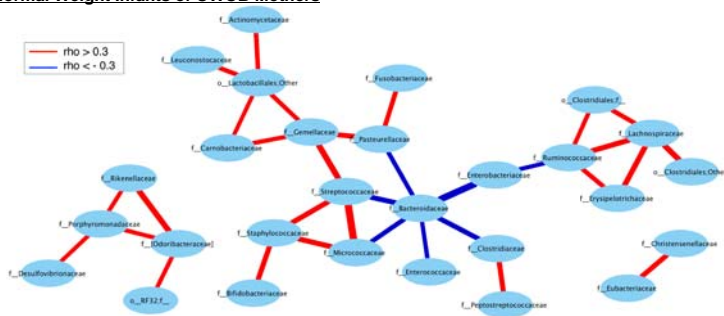

**OWOB Infants of OWOB Mothers**

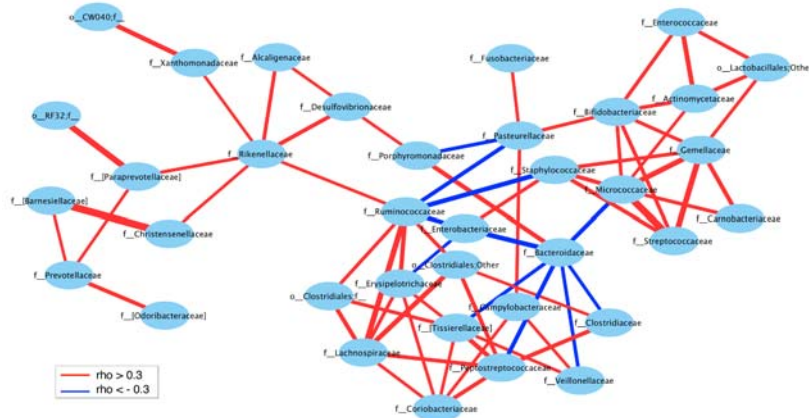

**eTable 1.** Odds Ratios for Childhood OWOB at Age 1 and 3 in Relation to Maternal Weight Status, Birth Modes, and Infant Gut Microbiota

|                                                            |                               | Child OWOB at 1 year |         | Child OWOB at 3 years |         |
|------------------------------------------------------------|-------------------------------|----------------------|---------|-----------------------|---------|
|                                                            |                               | OR (95%CI)           | P value | OR (95%CI)            | P value |
| <b>Maternal OWOB</b>                                       |                               |                      |         |                       |         |
| Crude Model                                                |                               | 3.14 (1.85-5.32)     | <0.0001 | 4.78 (2.92-7.84)      | <0.0001 |
| Adjusted Model <sup>1</sup>                                |                               | 3.80 (1.88-7.66)     | <0.0001 | 3.79 (2.10-6.84)      | <0.0001 |
| <b>Maternal BMI Z-score</b>                                |                               |                      |         |                       |         |
| Crude Model                                                |                               | 1.06 (1.02-1.10)     | 0.001   | 1.12 (1.08-1.16)      | <0.0001 |
| Adjusted Model <sup>1</sup>                                |                               | 1.06 (1.01-1.12)     | 0.015   | 1.09 (1.05-1.14)      | <0.0001 |
| <b>Chao1 (below vs above medium)</b>                       |                               |                      |         |                       |         |
| Crude Model                                                |                               | 2.12 (1.26-3.56)     | 0.004   | 1.63 (1.04-2.55)      | 0.032   |
| Adjusted Model <sup>2</sup>                                |                               | 1.65 (0.91-3.01)     | 0.101   | 1.32 (0.79-2.21)      | 0.294   |
| <b>Chao1 Firmicutes (below vs above medium)</b>            |                               |                      |         |                       |         |
| Crude Model                                                |                               | 2.36 (1.39-4.00)     | 0.002   | 1.84 (1.17-2.90)      | 0.008   |
| Adjusted Model <sup>2</sup>                                |                               | 1.90 (1.01-3.59)     | 0.047   | 1.49 (0.87-2.55)      | 1.151   |
| <b>Shannon Firmicutes (below vs above medium)</b>          |                               |                      |         |                       |         |
| Crude Model                                                |                               | 1.96 (1.17-3.27)     | 0.01    | 1.97 (1.25-3.10)      | 0.003   |
| Adjusted Model <sup>2</sup>                                |                               | 1.41 (0.76-2.62)     | 0.198   | 1.51 (0.89-2.57)      | 0.128   |
| <b>Birth Modes</b>                                         |                               |                      |         |                       |         |
| Crude Model                                                | Vaginal, IAP-                 | Ref                  |         | Ref                   |         |
|                                                            | Vaginal, IAP+                 | 1.25 (0.65-2.39)     | 0.504   | 1.66 (0.97-2.84)      | 0.063   |
|                                                            | Caesarean, scheduled          | 1.17 (0.50-2.76)     | 0.718   | 1.39 (0.66-2.91)      | 0.384   |
|                                                            | Caesarean, emergency          | 2.33 (1.22-4.46)     | 0.011   | 1.99 (1.07-3.70)      | 0.029   |
| Adjusted Model <sup>3</sup>                                | Vaginal, IAP-                 | Ref                  |         | Ref                   |         |
|                                                            | Vaginal, IAP+                 | 1.01 (0.46-2.26)     | 0.973   | 1.59 (0.82-3.05)      | 0.168   |
|                                                            | Caesarean, scheduled          | 0.80 (0.28-2.27)     | 0.669   | 1.33 (0.56-3.14)      | 0.516   |
|                                                            | Caesarean, emergency          | 1.89 (0.83-4.33)     | 0.132   | 1.95 (0.88-4.30)      | 0.098   |
| <b>Maternal OWOB and Caesarean Delivery</b>                |                               |                      |         |                       |         |
| Crude Model                                                | NW Mother and Vaginal Birth   | Ref                  |         | Ref                   |         |
|                                                            | NW Mother and CS              | 1.30 (0.50-3.41)     | 0.590   | 0.72 (0.24-2.16)      | 0.559   |
|                                                            | OWOB Mother and Vaginal Birth | 2.77 (1.46-5.28)     | 0.002   | 4.10 (2.31-7.27)      | <0.0001 |
|                                                            | OWOB Mother and CS            | 4.78 (2.33-9.83)     | <0.0001 | 7.30 (3.76-14.18)     | <0.0001 |
| Adjusted Model <sup>4</sup>                                | NW Mother and Vaginal Birth   | Ref                  |         | Ref                   |         |
|                                                            | NW Mother and CS              | 0.87 (0.23-3.27)     | 0.831   | 0.58 (0.16-2.07)      | 0.400   |
|                                                            | OWOB Mother and Vaginal Birth | 3.33 (1.49-7.41)     | 0.003   | 3.07 (1.58-5.96)      | 0.001   |
|                                                            | OWOB Mother and CS            | 5.02 (2.04-12.38)    | <0.0001 | 5.55 (2.55-12.04)     | <0.0001 |
| <b>Maternal OWOB and Emergency CS Delivery<sup>#</sup></b> |                               |                      |         |                       |         |
| Crude Model                                                | NW Mother and Vaginal Birth   | Ref                  |         | Ref                   |         |
|                                                            | NW Mother and Emergency CS    | 2.28 (0.81-6.45)     | 0.121   | 1.09 (0.31-3.79)      | 0.890   |
|                                                            | OWOB Mother and Vaginal Birth | 3.14 (1.69-5.83)     | <0.0001 | 4.54 (2.63-7.83)      | <0.0001 |
|                                                            | OWOB Mother and Emergency CS  | 6.43 (2.81-14.68)    | <0.0001 | 8.53 (3.97-18.40)     | <0.0001 |
| Adjusted Model <sup>4</sup>                                | NW Mother and Vaginal Birth   | Ref                  |         | Ref                   |         |
|                                                            | NW Mother and Emergency CS    | 1.12 (0.23-5.36)     | 0.892   | 0.85 (0.18-3.95)      | 0.837   |
|                                                            | OWOB Mother and Vaginal Birth | 3.27 (1.54-6.95)     | 0.002   | 3.44 (1.84-6.44)      | <0.0001 |
|                                                            | OWOB Mother and Emergency CS  | 7.92 (2.85-21.98)    | <0.0001 | 7.10 (2.76-18.26)     | <0.0001 |

<sup>1</sup>Adjusted for location, birth modes, infant sex, socioeconomic status (SES), maternal race, maternal prenatal asthma, maternal prenatal smoking, breastfeeding status, oral antibiotic use (0-12months), and pet exposure.

<sup>2</sup>Adjusted for location, birth modes, infant sex, maternal weight status, maternal race, maternal prenatal asthma, maternal prenatal smoking, breastfeeding status, oral antibiotic use (0-12months), pet exposure, and age at fecal sampling.

<sup>3</sup>Adjusted for location, infant sex, SES, maternal weight status, maternal race, maternal prenatal asthma, maternal prenatal smoking, breastfeeding status, oral antibiotic use (0-12months), and pet exposure.

<sup>4</sup>Adjusted for location, infant sex, SES, maternal race, maternal prenatal asthma, maternal prenatal smoking, breastfeeding status, oral antibiotic use (0-12months), and pet exposure.

<sup>#</sup>Only emergency CS was included in the model because it drove the CS association with child OWOB.

**eTable 2.** Significant Microbiota Measurements in Infant Gut at 3-4 Months, According to Maternal Weight Status ( $P<.05$ )

|                     | <b>NW Mother<br/>N=553<br/>Median (IQR)</b> | <b>OFOB Mother<br/>N=382<br/>Median (IQR)</b> | <b>P Value</b> |
|---------------------|---------------------------------------------|-----------------------------------------------|----------------|
| <b>Diversity</b>    |                                             |                                               |                |
| Chao1               | 193.30 (168.42-226.88)                      | 202.77 (174.11-232.37)                        | .005           |
| Chao1 Firmicutes    | 73.00 (50.69-94.38)                         | 75.05 (57.45-101.93)                          | .015           |
| Shannon Firmicutes  | 2.54 (1.97-3.06)                            | 2.77 (2.23-3.25)                              | <.001          |
| <b>Phyla</b>        |                                             |                                               |                |
| Proteobacteria      | 19.66 (9.70-40.41)                          | 16.68 (5.73-38.97)                            | .015           |
| <b>Families</b>     |                                             |                                               |                |
| Coriobacteriaceae   | 0.04 (0.01-0.14)                            | 0.05 (0.01-0.30)                              | <.001          |
| Erysipelotrichaceae | 0.02 (0.00-0.31)                            | 0.04 (0.00-0.35)                              | .032           |
| Lachnospiraceae     | 2.04 (0.03-9.83)                            | 3.56 (0.24-9.70)                              | .043           |
| Ruminococcaceae     | 0.05 (0.00-1.51)                            | 0.28 (0.01-2.03)                              | .002           |
| Enterobacteriaceae  | 18.05 (7.52-38.82)                          | 14.70 (4.16-37.39)                            | .009           |
| Pasteurellaceae     | 0.05 (0.00-0.41)                            | 0.02 (0.00-0.22)                              | .001           |
| <b>Ratios</b>       |                                             |                                               |                |
| E/B ratio           | 1.78 (0.19-380.32)                          | 0.80 (0.10-289.73)                            | .036           |



**eTable 3.** Significant Microbiota Measurements in Infant Gut at 3-4 Months, According to Joint Effects of Maternal Prepregnancy OWOB and Emergency CS ( $P<.05$ )

| Microbiota Measurements   | NW Mother and Vaginal Birth<br>N=421<br>Median (IQR) | NW Mother and Emergency CS<br>N=68<br>Median (IQR) | OWOB Mother and Vaginal Birth<br>N=267<br>Median (IQR) | OWOB Mother and Emergency CS<br>N=59<br>Median (IQR) | P Value |
|---------------------------|------------------------------------------------------|----------------------------------------------------|--------------------------------------------------------|------------------------------------------------------|---------|
| <b>Diversities</b>        |                                                      |                                                    |                                                        |                                                      |         |
| Chao1                     | 194.79 (170.11-229.09) <sup>a</sup>                  | 186.23 (149.66-224.82) <sup>a</sup>                | 204.00 (177.30-237.04) <sup>b</sup>                    | 207.14 (177.05-229.52) <sup>ab</sup>                 | .009    |
| Chao1 Firmicutes          | 71.33 (48.88-91.39) <sup>a</sup>                     | 81.25 (55.93-110.91) <sup>b</sup>                  | 71.60 (54.38-93.00) <sup>a</sup>                       | 90.11 (68.67-117.50) <sup>b</sup>                    | <.001   |
| Shannon Firmicutes        | 2.51 (1.91-3.07) <sup>a</sup>                        | 2.58 (1.96-3.08) <sup>a</sup>                      | 2.73 (2.21-3.29) <sup>b</sup>                          | 2.72 (2.20-3.08) <sup>b</sup>                        | .004    |
| Chao1 Bacteroidetes       | 48.75 (13.13-77.63) <sup>a</sup>                     | 12.00 (5.13-33.00) <sup>b</sup>                    | 56.67 (21.00-90.08) <sup>c</sup>                       | 11.00 (6.00-40.50) <sup>b</sup>                      | <.001   |
| Chao1 Proteobacteria      | 55.75 (40.29-74.00) <sup>a</sup>                     | 63.79 (47.57-79.52) <sup>b</sup>                   | 56.00 (35.00-71.09) <sup>a</sup>                       | 68.00 (54.75-85.09) <sup>b</sup>                     | <.001   |
| <b>Phyla</b>              |                                                      |                                                    |                                                        |                                                      |         |
| Bacteroidetes             | 27.99 (0.17-62.63) <sup>a</sup>                      | 0.12 (0.04-1.15) <sup>b</sup>                      | 44.85 (0.53-70.30) <sup>c</sup>                        | 0.11 (0.06-4.15) <sup>b</sup>                        | <.001   |
| Firmicutes                | 20.71 (7.79-44.11) <sup>a</sup>                      | 33.99 (21.72-66.84) <sup>b</sup>                   | 16.14 (7.06-33.16) <sup>a</sup>                        | 40.70 (17.80-57.94) <sup>b</sup>                     | <.001   |
| Proteobacteria            | 17.44 (9.27-39.70) <sup>a</sup>                      | 25.32 (12.51-50.49) <sup>b</sup>                   | 14.26 (4.78-33.30) <sup>c</sup>                        | 31.82 (13.84-48.77) <sup>b</sup>                     | <.001   |
| <b>Families</b>           |                                                      |                                                    |                                                        |                                                      |         |
| <i>Actinomycetaceae</i>   | 0.02 (0.00-0.09) <sup>a</sup>                        | 0.03 (0.00-0.09) <sup>b</sup>                      | 0.02 (0.00-0.10) <sup>a</sup>                          | 0.04 (0.02-0.13) <sup>b</sup>                        | .029    |
| <i>Coriobacteriaceae</i>  | 0.03 (0.00-0.12) <sup>a</sup>                        | 0.04 (0.01-0.12) <sup>a</sup>                      | 0.05 (0.01-0.33) <sup>b</sup>                          | 0.05 (0.01-0.44) <sup>b</sup>                        | .009    |
| <i>Bacteroidaceae</i>     | 23.99 (0.12-59.50) <sup>a</sup>                      | 0.10 (0.03-0.64) <sup>b</sup>                      | 37.10 (0.36-65.73) <sup>c</sup>                        | 0.09 (0.03-1.63) <sup>b</sup>                        | <.001   |
| <i>Clostridiaceae</i>     | 0.23 (0.02-2.41) <sup>a</sup>                        | 1.48 (0.12-5.88) <sup>b</sup>                      | 0.24 (0.03-1.37) <sup>a</sup>                          | 1.20 (0.30-6.15) <sup>b</sup>                        | <.001   |
| <i>Enterococcaceae</i>    | 0.02 (0.00-0.09) <sup>a</sup>                        | 0.05 (0.02-0.12) <sup>b</sup>                      | 0.02 (0.00-0.05) <sup>a</sup>                          | 0.07 (0.02-0.22) <sup>b</sup>                        | <.001   |
| <i>Lachnospiraceae</i>    | 1.79 (0.03-8.82) <sup>a</sup>                        | 4.21 (0.02-14.38) <sup>b</sup>                     | 2.59 (0.25-8.55) <sup>ab</sup>                         | 5.59 (0.21-14.44) <sup>b</sup>                       | .022    |
| <i>Ruminococcaceae</i>    | 0.04 (0.00-1.37) <sup>a</sup>                        | 0.07 (0.01-3.02) <sup>a</sup>                      | 0.32 (0.01-2.08) <sup>ab</sup>                         | 0.07 (0.01-1.62) <sup>a</sup>                        | .007    |
| <i>Streptococcaceae</i>   | 0.57 (0.19-1.75) <sup>a</sup>                        | 0.86 (0.32-2.13) <sup>b</sup>                      | 0.46 (0.16-1.62) <sup>a</sup>                          | 1.05 (0.41-2.28) <sup>b</sup>                        | .007    |
| <i>Veillonellaceae</i>    | 3.64 (0.55-16.85) <sup>a</sup>                       | 10.59 (3.86-27.00) <sup>b</sup>                    | 3.61 (0.66-12.13) <sup>a</sup>                         | 11.67 (1.51-30.40) <sup>b</sup>                      | <.001   |
| <i>Enterobacteriaceae</i> | 15.69 (6.95-36.63) <sup>a</sup>                      | 24.57 (10.79-49.97) <sup>b</sup>                   | 10.51 (3.45-30.28) <sup>c</sup>                        | 29.23 (11.27-48.35) <sup>b</sup>                     | <.001   |
| <i>Pasteurellaceae</i>    | 0.05 (0.00-0.39) <sup>a</sup>                        | 0.08 (0.00-0.87) <sup>a</sup>                      | 0.02 (0.00-0.12) <sup>b</sup>                          | 0.05 (0.00-0.55) <sup>a</sup>                        | <.001   |
| <b>Ratios</b>             |                                                      |                                                    |                                                        |                                                      |         |
| F/B ratio                 | 0.81 (0.17-105.00) <sup>a</sup>                      | 201.49 (15.56-1062.60) <sup>b</sup>                | 0.48 (0.13-23.27) <sup>c</sup>                         | 295.32 (8.31-810.13) <sup>b</sup>                    | <.001   |
| E/B ratio                 | 0.78 (0.15-163.67) <sup>a</sup>                      | 213.90 (7.61-945.51) <sup>b</sup>                  | 0.37 (0.07-51.01) <sup>c</sup>                         | 221.17 (6.06-851.22) <sup>b</sup>                    | <.001   |

<sup>a-c</sup>Means within a row with different superscripts differ  $P<.05$  in Dunn's post hoc tests.

**eTable 4.** Crude and Adjusted Likelihoods of Infant Gut Microbiota Measurements at 3-4 Months in Relation to Maternal OWOB

| Microbiota Measurements | Maternal OWOB              |                                            |
|-------------------------|----------------------------|--------------------------------------------|
|                         | Crude Model<br>OR (95% CI) | Adjusted Model <sup>#</sup><br>aOR (95%CI) |
| Chao1                   | 1.45 (1.12-1.89)           | 1.26 (0.93-1.69)                           |
| Shannon Firmicutes      | 1.53 (1.18-1.99)           | 1.19 (0.88-1.61)                           |
| Coriobacteriaceae       | 1.30 (1.00-1.69)           | 1.27 (0.89-1.83)                           |
| Erysipelotrichaceae     | 1.30 (1.00-1.69)           | 0.94 (0.69-1.28)                           |
| Lachnospiraceae         | 1.31 (1.01-1.70)           | 0.84 (0.61-1.15)                           |
| Ruminococcaceae         | 1.60 (1.23-2.08)           | 1.09 (0.79-1.50)                           |
| Pasteurellaceae         | 0.69 (0.53-0.90)           | 0.83 (0.61-1.13)                           |
| E/B ratio               | 0.77 (0.59-1.00)           | 0.71 (0.52-0.97)                           |

<sup>#</sup>Adjusted for birth modes, infant sex, maternal race, breastfeeding status, direct antibiotic use (0-3 months), maternal prenatal asthma, maternal prenatal smoking, pet exposure and age at fecal sampling.

**eTable 5.** Crude and Adjusted Likelihoods of Infant Gut Microbiota Measurements at 3-4 Months in Relation to Maternal Prepregnancy OWOB and Emergency Cesarean Delivery

| Microbiota Measurement      | NW Mother and Vaginal | NW Mother and Emergency CS | OWOB Mother and Vaginal | OWOB Mother and Emergency CS |
|-----------------------------|-----------------------|----------------------------|-------------------------|------------------------------|
| Chao1                       |                       |                            |                         |                              |
| Crude Model                 | Ref                   | 0.60 (0.35-1.02)           | 1.44 (1.06-1.96)        | 2.02 (1.14-1.75)             |
| Adjusted Model <sup>#</sup> | Ref                   | 0.55 (0.30-1.01)           | 1.42 (0.97-2.08)        | 1.73 (0.93-3.22)             |
| Chao1 Firmicutes            |                       |                            |                         |                              |
| Crude Model                 | Ref                   | 1.44 (0.86-2.41)           | 1.01 (0.75-1.38)        | 2.59 (1.44-4.66)             |
| Adjusted Model <sup>#</sup> | Ref                   | 1.61 (0.89-2.91)           | 0.75 (0.51-1.12)        | 2.17 (1.14-4.14)             |
| Shannon Firmicutes          |                       |                            |                         |                              |
| Crude Model                 | Ref                   | 1.16 (0.69-1.94)           | 1.57 (1.15-2.13)        | 1.37 (0.80-2.37)             |
| Adjusted Model <sup>#</sup> | Ref                   | 1.37 (0.76-2.47)           | 1.22 (0.82-1.80)        | 1.23 (0.66-2.28)             |
| Chao1 Bacteroidetes         |                       |                            |                         |                              |
| Crude Model                 | Ref                   | 0.15 (0.08-0.29)           | 1.50 (1.10-2.06)        | 0.26 (0.14-0.49)             |
| Adjusted Model <sup>#</sup> | Ref                   | 0.10 (0.05-0.23)           | 1.45 (0.98-2.15)        | 0.20 (0.10-0.40)             |
| Chao1 Proteobacteria        |                       |                            |                         |                              |
| Crude Model                 | Ref                   | 2.17 (1.27-3.69)           | 1.08 (0.80-1.47)        | 2.30 (1.33-4.08)             |
| Adjusted Model <sup>#</sup> | Ref                   | 2.00 (1.13-3.55)           | 1.65 (1.13-2.41)        | 2.68 (1.45-4.92)             |
| Bacteroidetes               |                       |                            |                         |                              |
| Crude Model                 | Ref                   | 0.21 (0.11-0.39)           | 1.60 (1.17-2.20)        | 0.17 (0.08-0.33)             |
| Adjusted Model <sup>#</sup> | Ref                   | 0.18 (0.09-0.36)           | 1.68 (1.13-2.49)        | 0.15 (0.07-0.31)             |
| Firmicutes                  |                       |                            |                         |                              |
| Crude Model                 | Ref                   | 2.91 (1.65-5.10)           | 0.77 (0.56-1.04)        | 3.03 (1.65-5.54)             |
| Adjusted Model <sup>#</sup> | Ref                   | 2.54 (1.40-4.59)           | 0.77 (0.53-1.12)        | 3.07 (1.61-5.84)             |
| Proteobacteria              |                       |                            |                         |                              |
| Crude Model                 | Ref                   | 1.87 (1.10-3.16)           | 0.72 (0.53-0.98)        | 2.11 (1.19-3.75)             |
| Adjusted Model <sup>#</sup> | Ref                   | 1.74 (0.97-3.12)           | 0.90 (0.61-1.32)        | 2.72 (1.46-5.09)             |
| Bacteroidaceae              |                       |                            |                         |                              |
| Crude Model                 | Ref                   | 0.16 (0.08-0.31)           | 1.50 (1.09-2.06)        | 0.15 (0.08-0.31)             |
| Adjusted Model <sup>#</sup> | Ref                   | 0.14 (0.07-0.29)           | 1.58 (1.07-2.33)        | 0.14 (0.07-0.30)             |
| Enterococcaceae             |                       |                            |                         |                              |
| Crude Model                 | Ref                   | 2.55 (1.47-4.45)           | 0.86 (0.63-1.17)        | 2.07 (1.17-3.68)             |
| Adjusted Model <sup>#</sup> | Ref                   | 2.54 (1.41-4.56)           | 0.98 (0.67-1.41)        | 2.05 (1.13-3.73)             |
| Clostridiaceae              |                       |                            |                         |                              |
| Crude Model                 | Ref                   | 2.97 (1.71-5.19)           | 1.00 (0.73-1.35)        | 2.82 (1.57-5.08)             |
| Adjusted Model <sup>#</sup> | Ref                   | 2.59 (1.45-4.63)           | 0.88 (0.60-1.27)        | 2.66 (1.43-4.93)             |
| Lachnospiraceae             |                       |                            |                         |                              |
| Crude Model                 | Ref                   | 1.45 (0.87-2.43)           | 1.24 (0.91-1.68)        | 2.56 (1.44-4.57)             |
| Adjusted Model <sup>#</sup> | Ref                   | 1.50 (0.82-2.74)           | 0.84 (0.57-1.25)        | 2.02 (1.06-3.87)             |
| Ruminococcaceae             |                       |                            |                         |                              |
| Crude Model                 | Ref                   | 1.26 (0.78-2.11)           | 1.92 (1.41-2.61)        | 1.14 (0.66-1.97)             |
| Adjusted Model <sup>#</sup> | Ref                   | 1.43 (0.77-2.67)           | 1.36 (0.91-2.03)        | 0.77 (0.40-1.48)             |
| Veillonellaceae             |                       |                            |                         |                              |
| Crude Model                 | Ref                   | 2.85 (1.62-5.01)           | 0.87 (0.64-1.19)        | 2.52 (1.40-4.52)             |
| Adjusted Model <sup>#</sup> | Ref                   | 3.03 (1.64-5.59)           | 0.75 (0.52-1.10)        | 2.47 (1.32-4.61)             |
| Enterobacteriaceae          |                       |                            |                         |                              |
| Crude Model                 | Ref                   | 2.10 (1.23-3.60)           | 0.71 (0.53-0.97)        | 1.81 (1.03-3.17)             |
| Adjusted Model <sup>#</sup> | Ref                   | 1.98 (1.09-3.59)           | 0.89 (0.61-1.30)        | 2.25 (1.22-4.16)             |
| Pasteurellaceae             |                       |                            |                         |                              |
| Crude Model                 | Ref                   | 1.17 (0.70-1.97)           | 0.59 (0.43-0.80)        | 0.90 (0.52-1.55)             |
| Adjusted Model <sup>#</sup> | Ref                   | 1.17 (0.65-2.09)           | 0.67 (0.45-1.00)        | 1.36 (0.73-2.53)             |
| F/B ratio                   |                       |                            |                         |                              |
| Crude Model                 | Ref                   | 5.69 (2.96-10.94)          | 0.65 (0.47-0.89)        | 6.74 (3.22-14.09)            |
| Adjusted Model <sup>#</sup> | Ref                   | 6.72 (3.23-14.00)          | 0.59 (0.40-0.88)        | 7.30 (3.39-15.74)            |
| E/B ratio                   |                       |                            |                         |                              |
| Crude Model                 | Ref                   | 4.45 (2.39-8.23)           | 0.59 (0.43-0.81)        | 4.91 (2.47-9.75)             |
| Adjusted Model <sup>#</sup> | Ref                   | 4.95 (2.48-9.84)           | 0.63 (0.43-0.93)        | 5.30 (2.57-10.93)            |

<sup>#</sup>Adjusted for infant sex, maternal race, breastfeeding status, direct antibiotic use (0-3 months), maternal prenatal asthma, maternal prenatal smoking, pet exposure and age at fecal sampling.

## eReferences

1. Caporaso JG, Kuczynski J, Stombaugh J, et al. QIIME allows analysis of high-throughput community sequencing data. *Nat Methods*. 2010;7(5):335-336.
2. DeSantis TZ, Hugenholtz P, Larsen N, et al. Greengenes, a chimera-checked 16S rRNA gene database and workbench compatible with ARB. *Appl Environ Microbiol*. 2006;72(7):5069-5072.
3. Wang Q, Garrity GM, Tiedje JM, Cole JR. Naive Bayesian classifier for rapid assignment of rRNA sequences into the new bacterial taxonomy. *Appl Environ Microbiol*. 2007;73(16):5261-5267.
